# Supplementary material for: Preclinical analyses of intravesical chemotherapy for prevention of bladder cancer progression
Source: PubMed Central journal article supplement (PMC3712572; doi:10.18632/oncotarget.852), 2013-02-25
Supplement: oncotarget-04-269-s001.pdf [file oncotarget-04-269-s001.pdf]

# Preclinical analyses of intravesical chemotherapy for prevention of bladder cancer progression - Delto et al

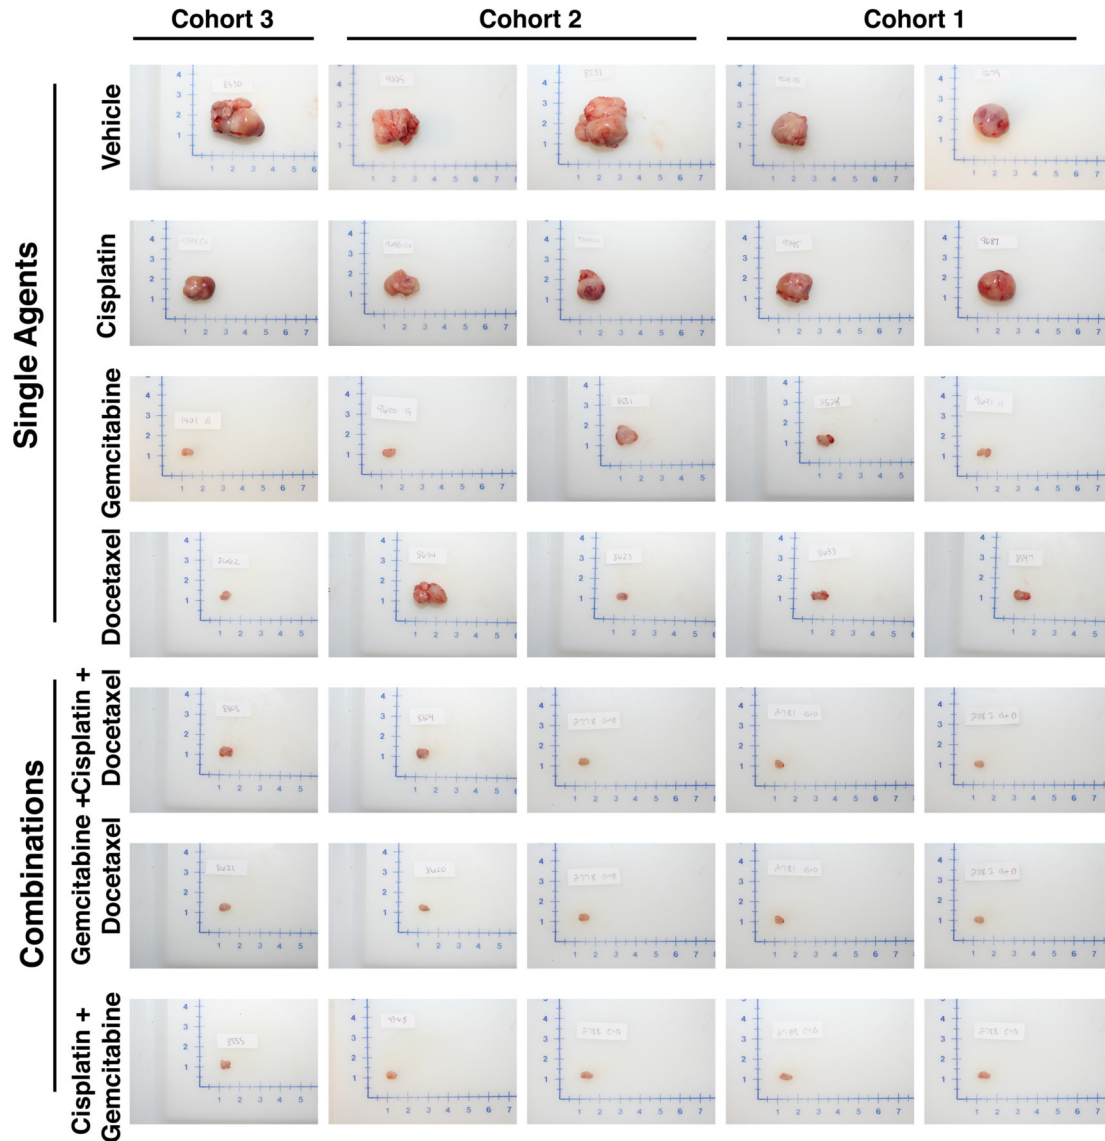

Supplementary Figure 1: Representative whole mount images of the bladder following the treatments, as indicated, and showing examples from each of three independent cohorts.
